# Supplementary material for: The Impact of Ethnicity and Age on Distribution of Metastases in Patients with Upper Tract Urothelial Carcinoma: Analysis of SEER Data
Source: MDPI journal article supplement (doi:10.3390/biomedicines11071943), 2023-07-08
Supplement: s1 [file s1]

Supplementary Table S1. Location of metastases according to ethnicity and age

| <div>CaucasiansAfrican-Americans</div> |       |       |       |       |         |       |        |       |       |         |
|----------------------------------------|-------|-------|-------|-------|---------|-------|--------|-------|-------|---------|
|                                        | ≤63   | 64–72 | 73–79 | ≥80   | p value | ≤63   | 64–72  | 73–79 | ≥80   | P value |
| Lung                                   | 42.3% | 44.9% | 30.6% | 36.6% | 0.010   | 34%   | 60%    | 53.8% | 51.7% | 0.04    |
| Distant Lymph Node                     | 33.9% | 32.5% | 36.5% | 40.1% | 0.36    | 54.7% | 37.8%  | 50%   | 45.1% | 0.27    |
| Bone                                   | 37.2% | 39.7% | 33.3% | 31.7% | 0.27    | 37.7% | 33.3.% | 34.6% | 27.6% | 0.72    |
| Liver                                  | 30.5% | 37.6% | 32.0% | 26.7% | 0.10    | 24.5% | 22.2%  | 11.5% | 27.6% | 0.44    |
| Brain                                  | 1.7%  | 0%    | 1.8%  | 1.5%  | 0.25    | 0%    | 2.2%   | 7.7%  | 3.4%  | 0.25    |
